# Supplementary material
Source: publisher figshare collection journal article supplement (https://acs.figshare.com/ndownloader/files/5165569)

**Supporting Information** for the paper "*Photoinduced intramolecular electron transfer in Ruthenium and Osmium polyads: insights from theory*"

**[A]<sup>-</sup>**

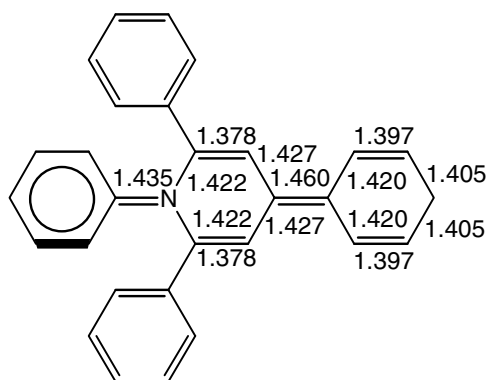

**[L1A]<sup>-</sup>**

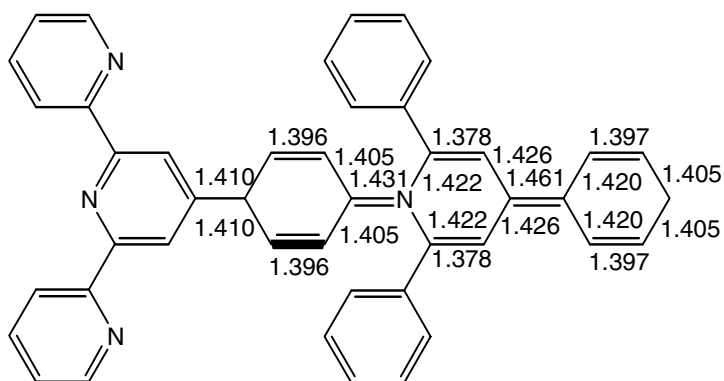

Supplement: Supplementary file 1 [file 5165569]
